# Supplementary material for: Influence of thrombocytopenia on bleeding and vascular events in atrial fibrillation
Source: PubMed Central journal article supplement — Blood Adv. 2023 Sep 28;7(24):7516–24. doi: 10.1182/bloodadvances.2023011235 (PMC10761355; doi:10.1182/bloodadvances.2023011235), 2023-09-28
Supplement: BLOODA_ADV-2023-011235-mmc1.pdf [file BLOODA_ADV-2023-011235-mmc1.pdf]

**Influence of thrombocytopenia on bleeding and vascular events in atrial fibrillation**

**Table of Contents**

**Supplementary Figure 1. All-cause mortality according to cancer status. ....2**

**Supplementary Figure 2. Assessment of Match. ....3**

**Supplementary Table 1: Cancer diagnoses .....4**

**Supplementary Table 2. Univariable analysis, major bleeding .....5**

**Supplementary Table 3. Univariable analysis, clinically relevant non-major bleeding .....6**

**Supplementary Table 4. Multivariable analysis, clinically relevant non-major bleeding .....7**

**Supplementary Table 5. Univariable analysis, thrombosis .....8**

**Supplementary Table 6. Multivariable analysis, thrombosis .....9**

Supplementary Figure 1. All-cause mortality according to cancer status.

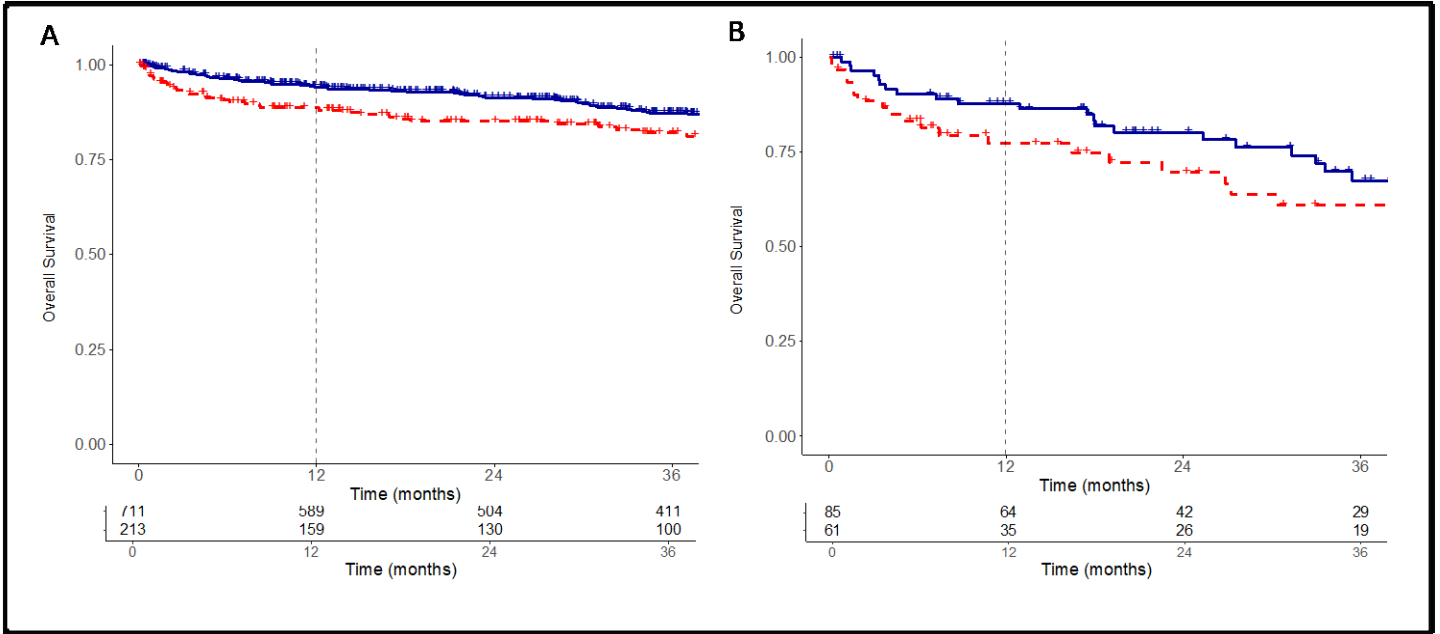

All-cause mortality in patients with baseline thrombocytopenia vs. normal platelet counts according to cancer status. (A)

Patients without cancer. (B) Patients with cancer. Thrombocytopenia in red, controls in blue.

Supplementary Figure 2. Assessment of Match.

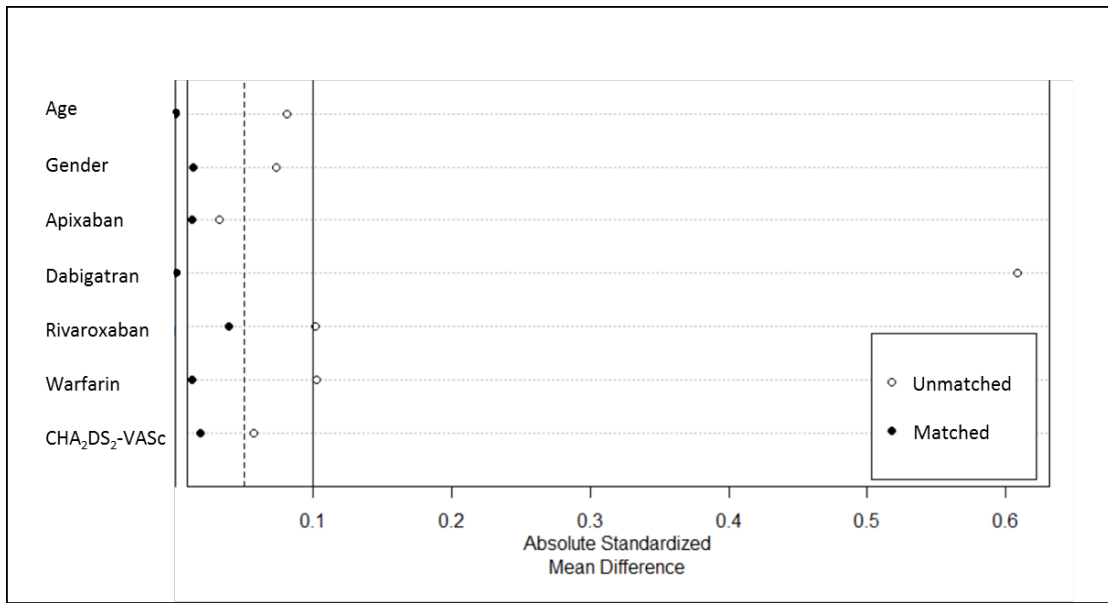

Absolute standardized mean difference for baseline covariates before and after matching. All covariates have values smaller than 0.05, indicating that the difference in means across cohorts were relatively small after matching.

**Supplementary Table 1: Cancer diagnoses**

|                                  | <b>Thrombocytopenia<br/><i>n</i> = 274</b> | <b>Control<br/><i>n</i> = 801</b> |
|----------------------------------|--------------------------------------------|-----------------------------------|
| <b>Total cases, <i>n</i></b>     | 61                                         | 85                                |
| <b>Cancer type, <i>n</i> (%)</b> |                                            |                                   |
| Brain                            | 0 (0.0)                                    | 1 (1.2)                           |
| Breast                           | 1 (1.6)                                    | 4 (4.7)                           |
| Gastrointestinal                 | 10 (16.4)                                  | 9 (10.6)                          |
| Genitourinary                    | 1 (1.6)                                    | 19 (22.4)                         |
| Gynecologic                      | 0 (0.0)                                    | 6 (7.1)                           |
| Head and Neck                    | 2 (3.3)                                    | 3 (3.5)                           |
| Hematologic                      | 36 (59.0)                                  | 23 (27.1)                         |
| Lung                             | 5 (8.2)                                    | 11 (12.9)                         |
| Skin                             | 0 (0.0)                                    | 3 (3.5)                           |
| Other                            | 6 (9.8)                                    | 6 (7.1)                           |

Supplementary Table 2. Univariable analysis, major bleeding

| Characteristic   | All patients (n=1070)   |                   | Platelet count <75,000/ $\mu$ L (n=519) |              | Platelet count 75,000-100,000/ $\mu$ L (n=551) |               |
|------------------|-------------------------|-------------------|-----------------------------------------|--------------|------------------------------------------------|---------------|
|                  | HR (95% CI)             | P-value           | HR (95% CI)                             | P-value      | HR (95% CI)                                    | P-value       |
| Age > 65         | <b>1.96 (1.10-3.49)</b> | <b>0.02</b>       | <b>3.26 (1.15-9.21)</b>                 | <b>0.03</b>  | 1.44 (0.71-2.91)                               | 0.31          |
| Sex*             | 1 (0.64-1.56)           | 0.99              | 1.14 (0.59-2.19)                        | 0.69         | 0.88 (0.48-1.63)                               | 0.69          |
| Hypertension     | <b>2.18 (1.38-3.42)</b> | <b>0.0008</b>     | 1.59 (0.77-3.27)                        | 0.21         | <b>2.72 (1.51-4.92)</b>                        | <b>0.0009</b> |
| Cancer           | 0.78 (0.39-1.55)        | 0.48              | 0.70 (0.25-1.95)                        | 0.49         | 0.88 (0.35-2.19)                               | 0.78          |
| Kidney disease   | 1.68 (0.89-3.18)        | 0.11              | 1.75 (0.68-4.48)                        | 0.25         | 1.6 (0.68-3.78)                                | 0.28          |
| Prior Bleed      | 1.01 (0.24-4.26)        | 0.99              | 1.47 (0.19-11.01)                       | 0.71         | 0.74 (0.10-5.66)                               | 0.77          |
| Thrombocytopenia | <b>2.48 (1.60-3.84)</b> | <b>&lt;0.0001</b> | <b>2.36 (1.23-4.51)</b>                 | <b>0.009</b> | <b>2.57 (1.42-4.65)</b>                        | <b>0.002</b>  |
| Anticoagulant**  | 1.29 (0.83-2)           | 0.25              | 1.22 (0.64-2.32)                        | 0.55         | 1.34 (0.74-2.44)                               | 0.33          |
| Antiplatelet     | 1.51 (0.88-2.61)        | 0.14              | 2.05 (0.86-4.87)                        | 0.1          | 1.19 (0.59-2.4)                                | 0.64          |

P < 0.05, statistically significant

\* Hazard ratios are for the female group as compared with the male group.

\*\* Hazard ratios are for the warfarin group as compared with the direct-acting oral anticoagulant group

CI, Confidence interval

Supplementary Table 3. Univariable analysis, clinically relevant non-major bleeding

| Characteristic          | All patients (n=1070) |              | Platelet count <75,000/ $\mu$ L (n=519) |         | Platelet count 75,000-100,000/ $\mu$ L (n=551) |              |
|-------------------------|-----------------------|--------------|-----------------------------------------|---------|------------------------------------------------|--------------|
|                         | HR (95% CI)           | P-value      | HR (95% CI)                             | P-value | HR (95% CI)                                    | P-value      |
| Age > 65                | 1.2 (0.87-1.66)       | 0.26         | 1.52 (0.9-2.56)                         | 0.11    | 1.02 (0.68-1.54)                               | 0.92         |
| Sex*                    | 0.9 (0.67-1.2)        | 0.47         | 0.87 (0.56-1.35)                        | 0.53    | 0.92 (0.62-1.34)                               | 0.65         |
| <b>Hypertension</b>     | 1.63 (1.21-2.21)      | <b>0.002</b> | 1.46 (0.91-2.36)                        | 0.12    | <b>1.74 (1.18-2.58)</b>                        | <b>0.005</b> |
| Kidney disease          | 1.44 (0.93-2.22)      | 0.1          | 1.7 (0.9-3.24)                          | 0.1     | 1.24 (0.68-2.23)                               | 0.48         |
| Cancer                  | 0.91 (0.6-1.39)       | 0.67         | 0.65 (0.33-1.28)                        | 0.21    | 1.21 (0.71-2.04)                               | 0.48         |
| Prior Bleed             | 1.1 (0.42-2.85)       | 0.85         | 0.61 (0.08-4.65)                        | 0.63    | 1.33 (0.44-4)                                  | 0.61         |
| <b>Thrombocytopenia</b> | 1.53 (1.14-2.05)      | <b>0.005</b> | 1.48 (0.94-2.31)                        | 0.09    | <b>1.56 (1.05-2.32)</b>                        | <b>0.03</b>  |
| Anticoagulant**         | 1.14 (0.86-1.5)       | 0.37         | 1.23 (0.81-1.87)                        | 0.33    | 1.06 (0.73-1.53)                               | 0.77         |
| Antiplatelet            | 1.32 (0.95-1.84)      | 0.1          | 1.46 (0.89-2.4)                         | 0.14    | 1.2 (0.77-1.88)                                | 0.42         |

P < 0.05, statistically significant

\* Hazard ratios are for the female group as compared with the male group.

\*\* Hazard ratios are for the warfarin group as compared with the direct-acting oral anticoagulant group

CI, Confidence interval

**Supplementary Table 4. Multivariable analysis, clinically relevant non-major bleeding**

| Characteristic   | All patients (n=1070) |         | Platelet count <75,000/ $\mu$ L (n=519) |         | Platelet count 75,000-100,000/ $\mu$ L (n=551) |         |
|------------------|-----------------------|---------|-----------------------------------------|---------|------------------------------------------------|---------|
|                  | HR (95% CI)           | P-value | HR (95% CI)                             | P-value | HR (95% CI)                                    | P-value |
| Age > 65         | 1.19 (0.86-1.65)      | 0.3     | 1.66 (0.98-2.8)                         | 0.06    | 0.95 (0.61-1.46)                               | 0.8     |
| Sex*             | 0.89 (0.66-1.19)      | 0.42    | 0.85 (0.54-1.32)                        | 0.46    | 0.9 (0.6-1.35)                                 | 0.61    |
| Hypertension     | 1.37 (0.97-1.94)      | 0.08    | 1.2 (0.68-2.12)                         | 0.53    | 1.56 (1-2.45)                                  | 0.05    |
| Kidney disease   | 1.31 (0.85-2.02)      | 0.23    | 1.63 (0.83-3.2)                         | 0.16    | 1.16 (0.65-2.08)                               | 0.62    |
| Cancer           | 0.86 (0.56-1.32)      | 0.48    | 0.54 (0.26-1.11)                        | 0.09    | 1.23 (0.73-2.09)                               | 0.44    |
| Prior Bleed      | 1.07 (0.41-2.79)      | 0.89    | 0.49 (0.06-3.68)                        | 0.49    | 1.52 (0.5-4.68)                                | 0.46    |
| Thrombocytopenia | 1.32 (0.94-1.85)      | 0.11    | 1.53 (0.89-2.65)                        | 0.13    | 1.27 (0.82-1.95)                               | 0.28    |
| Anticoagulant**  | 1.11 (0.83-1.47)      | 0.49    | 1.26 (0.82-1.94)                        | 0.3     | 1.05 (0.71-1.55)                               | 0.79    |
| Antiplatelet     | 1.2 (0.85-1.69)       | 0.3     | 1.32 (0.78-2.21)                        | 0.3     | 1.08 (0.67-1.73)                               | 0.75    |

P < 0.05, statistically significant

\* Hazard ratios are for the female group as compared with the male group.

\*\* Hazard ratios are for the warfarin group as compared with the direct-acting oral anticoagulant group

CI, Confidence interval

Supplementary Table 5. Univariable analysis, thrombosis

| Characteristic             | All patients (n=1070)    |              | Platelet count <75,000/ $\mu$ L (n=519) |              | Platelet count 75,000-100,000/ $\mu$ L (n=551) |         |
|----------------------------|--------------------------|--------------|-----------------------------------------|--------------|------------------------------------------------|---------|
| <b>Arterial Thrombosis</b> |                          |              |                                         |              |                                                |         |
|                            | HR (95% CI)              | P-value      | HR (95% CI)                             | P-value      | HR (95% CI)                                    | P-value |
| Age > 65                   | 1.37 (0.51-3.71)         | 0.54         | 1.92 (0.42-8.75)                        | 0.4          | 0.97 (0.25-3.75)                               | 0.97    |
| Sex*                       | 1.35 (0.59-3.13)         | 0.48         | 1.70 (0.55-5.26)                        | 0.35         | 1.04 (0.29-3.67)                               | 0.95    |
| Diabetes                   | 1.77 (0.6-5.22)          | 0.3          | 1.64 (0.36-7.5)                         | 0.52         | 1.96 (0.43-9.06)                               | 0.39    |
| Heart Failure              | 1.01 (0.3-3.39)          | 0.99         | 1.52 (0.33-6.93)                        | 0.59         | 0.62 (0.08-4.78)                               | 0.65    |
| Hypertension               | 1.74 (0.71-4.26)         | 0.22         | 3.03 (0.96-9.5)                         | 0.06         | 0.86 (0.19-3.97)                               | 0.84    |
| Ischemic heart disease     | 2.02 (0.79-5.13)         | 0.14         | 3.15 (0.96-10.37)                       | 0.06         | 1.19 (0.26-5.54)                               | 0.82    |
| Cancer                     | 1.91 (0.7-5.16)          | 0.2          | 1.20 (0.26-5.47)                        | 0.81         | 3.02 (0.78-11.62)                              | 0.11    |
| Thrombocytopenia           | 2.08 (0.89-4.88)         | 0.09         | <b>4.38 (1.39-13.78)</b>                | <b>0.01</b>  | 0.73 (0.16-3.45)                               | 0.7     |
| Anticoagulant**            | 2.29 (0.94-5.61)         | 0.07         | 2.24 (0.68-7.36)                        | 0.18         | 2.38 (0.61-9.2)                                | 0.21    |
| Antiplatelet               | 2.32 (0.69-7.82)         | 0.17         | 1.92 (0.42-8.76)                        | 0.4          | 3.18 (0.4-25.02)                               | 0.27    |
| <b>Venous Thrombosis</b>   |                          |              |                                         |              |                                                |         |
|                            | HR (95% CI)              | P-value      | HR (95% CI)                             | P-value      | HR (95% CI)                                    | P-value |
| Age > 65                   | 1.31 (0.43-4.02)         | 0.63         | 0.67 (0.2-2.29)                         | 0.52         | —                                              | —       |
| Sex*                       | 2.33 (0.89-6.11)         | 0.09         | 2.99 (0.88-10.14)                       | 0.08         | 1.57 (0.32-7.72)                               | 0.58    |
| Cancer                     | 1.99 (0.65-6.09)         | 0.23         | 2.24 (0.6-8.4)                          | 0.23         | 1.4 (0.16-12.05)                               | 0.76    |
| Thrombocytopenia           | <b>4.31 (1.64-11.33)</b> | <b>0.003</b> | <b>8.29 (2.2-31.27)</b>                 | <b>0.002</b> | 1.48 (0.27-8.05)                               | 0.65    |
| Anticoagulant**            | 1.21 (0.46-3.13)         | 0.7          | 0.94 (0.29-3.09)                        | 0.92         | 2.04 (0.37-11.14)                              | 0.41    |
| Antiplatelet               | 0.88 (0.31-2.48)         | 0.8          | 1.03 (0.27-3.86)                        | 0.97         | 0.7 (0.13-3.79)                                | 0.68    |

P < 0.05, statistically significant

\* Hazard ratios are for the female group as compared with the male group.

\*\* Hazard ratios are for the warfarin group as compared with the direct-acting oral anticoagulant group

CI, Confidence interval



Supplementary Table 6. Multivariable analysis, thrombosis

| Characteristic             | All patients (n=1070)    |              | Platelet count <75,000/ $\mu$ L (n=519) |              | Platelet count 75,000-100,000/ $\mu$ L (n=551) |             |
|----------------------------|--------------------------|--------------|-----------------------------------------|--------------|------------------------------------------------|-------------|
| <b>Arterial Thrombosis</b> |                          |              |                                         |              |                                                |             |
|                            | HR (95% CI)              | P-value      | HR (95% CI)                             | P-value      | HR (95% CI)                                    | P-value     |
| Age > 65                   | 1.27 (0.46-3.5)          | 0.65         | 1.97 (0.43-9.08)                        | 0.38         | 0.85 (0.21-3.37)                               | 0.81        |
| Sex                        | 1.31 (0.57-3.01)         | 0.52         | 1.73 (0.59-5.06)                        | 0.32         | 0.91 (0.25-3.22)                               | 0.88        |
| Diabetes                   | 1.15 (0.39-3.44)         | 0.8          | 0.65 (0.15-2.89)                        | 0.57         | <b>4.28 (1.25-14.62)</b>                       | <b>0.02</b> |
| Heart Failure              | 0.44 (0.12-1.55)         | 0.2          | 0.41 (0.06-2.72)                        | 0.35         | 0.29 (0.02-3.93)                               | 0.35        |
| Hypertension               | 0.95 (0.35-2.62)         | 0.93         | 1.32 (0.36-4.9)                         | 0.68         | <b>0.41 (0.18-0.96)</b>                        | <b>0.04</b> |
| Ischemic heart disease     | 1.90 (0.8-4.55)          | 0.15         | 2.46 (0.85-7.1)                         | 0.1          | 1.95 (0.5-7.61)                                | 0.34        |
| Cancer                     | 2.21 (0.81-6.02)         | 0.12         | 0.86 (0.17-4.19)                        | 0.85         | <b>4.00 (1.05-15.23)</b>                       | <b>0.04</b> |
| Thrombocytopenia           | 1.79 (0.6-5.37)          | 0.3          | 4.23 (0.81-22.04)                       | 0.09         | 0.61 (0.09-4.29)                               | 0.62        |
| Anticoagulant              | <b>2.47 (1.03-5.93)</b>  | <b>0.04</b>  | 2.36 (0.71-7.81)                        | 0.16         | 2.99 (0.84-10.6)                               | 0.09        |
| Antiplatelet               | 2.06 (0.6-7.14)          | 0.25         | 1.66 (0.31-8.81)                        | 0.55         | 2.95 (0.34-25.37)                              | 0.32        |
| <b>Venous Thrombosis</b>   |                          |              |                                         |              |                                                |             |
|                            | HR (95% CI)              | P-value      | HR (95% CI)                             | P-value      | HR (95% CI)                                    | P-value     |
| Age > 65                   | 1.18 (0.38-3.63)         | 0.77         | 0.57 (0.17-1.91)                        | 0.36         | —                                              | —           |
| Sex*                       | 2.28 (0.86-6.07)         | 0.1          | 3.29 (0.96-11.26)                       | 0.06         | 1.54 (0.35-6.83)                               | 0.57        |
| Cancer                     | 1.54 (0.42-5.69)         | 0.52         | 1.25 (0.31-5)                           | 0.76         | 1.71 (0.14-20.32)                              | 0.67        |
| <b>Thrombocytopenia</b>    | <b>4.17 (1.60-10.85)</b> | <b>0.003</b> | <b>7.76 (2.06-29.25)</b>                | <b>0.002</b> | 1.62 (0.3-8.79)                                | 0.58        |
| Anticoagulant**            | 1.34 (0.46-3.85)         | 0.59         | 1.00 (0.29-3.45)                        | 0.99         | 2.30 (0.38-14.04)                              | 0.37        |
| Antiplatelet               | 0.84 (0.29-2.45)         | 0.75         | 1.32 (0.31-5.56)                        | 0.71         | 0.59 (0.1-3.47)                                | 0.56        |

P < 0.05, statistically significant

\* Hazard ratios are for the female group as compared with the male group.

\*\* Hazard ratios are for the warfarin group as compared with the direct-acting oral anticoagulant group

CI, Confidence interval
